# Supplementary material
Source: Springer Nature journal article supplement (https://www.springermedizin.de/resource/supplementary/12885_2012_3812_MOESM1_ESM.pdf/9464510)

XRT  
(13.5 Gy)

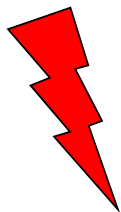

Mice on 0%, 10%, or 20% FLC

T = -72  
Hours

T = 0

+24  
Hours

+48  
Hours

+72  
Hours

T = 16 Weeks  
(sacrifice)

Start 0% FLC

Start 10% FLC or 20% FLC

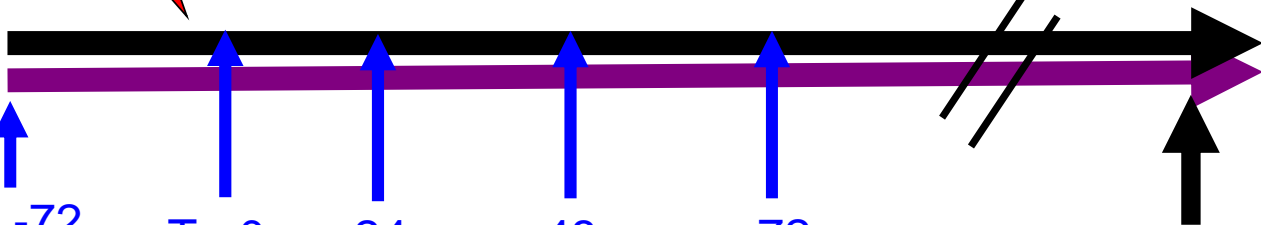

Supplement: MOESM1 [file 9464510]
